# Supplementary material for: Prediction of the Glass Transition Temperature in Polyethylene Terephthalate/Polyethylene Vanillate (PET/PEV) Blends: A Molecular Dynamics Study
Source: MDPI journal article supplement (doi:10.3390/polym14142858), 2022-07-13
Supplement: s1 [file s1]

## Supporting Material

# Prediction of the Glass Transition Temperature in Polyethylene Terephthalate/Polyethylene Vanillate (PET/PEV) Blends: A Molecular Dynamics Study

Mattanun Sangkhawasi <sup>1</sup>, Tawun Remsungnen <sup>2,\*</sup>, Alisa S. Vangnai <sup>3</sup>, Phornphimon Maitarad <sup>4</sup> and Thanyada Rungrotmongkol <sup>3,5,\*</sup>

<sup>1</sup> Program in Biotechnology, Faculty of Science, Chulalongkorn University, Bangkok 10330, Thailand; mattajung@gmail.com

<sup>2</sup> Faculty of Interdisciplinary Studies, Khon Kaen University, Nong Khai Campus, Nong Khai 43000, Thailand; rtawun@kku.ac.th

<sup>3</sup> Center of Excellence in Biocatalyst and Sustainable Biotechnology, Department of Biochemistry, Faculty of Science, Chulalongkorn University, Bangkok 10330, Thailand; alisa.v@chula.ac.th

<sup>4</sup> Research Center of Nano Science and Technology, Shanghai University, NO 99, Shangda Road, PO Box 111, Baoshan district, Shanghai 200444, China; pmaitarad@shu.edu.cn

<sup>5</sup> Program in Bioinformatics and Computational Biology, Graduate School, Chulalongkorn University, Bangkok 10330, Thailand; thanyada.r@chula.ac.th

\* Correspondence: rtawun@kku.ac.th (T.R.); thanyada.r@chula.ac.th (T.R.); Tel.: +66-81499-2030 (T.R.); +66-2218-5426 (T.R.)

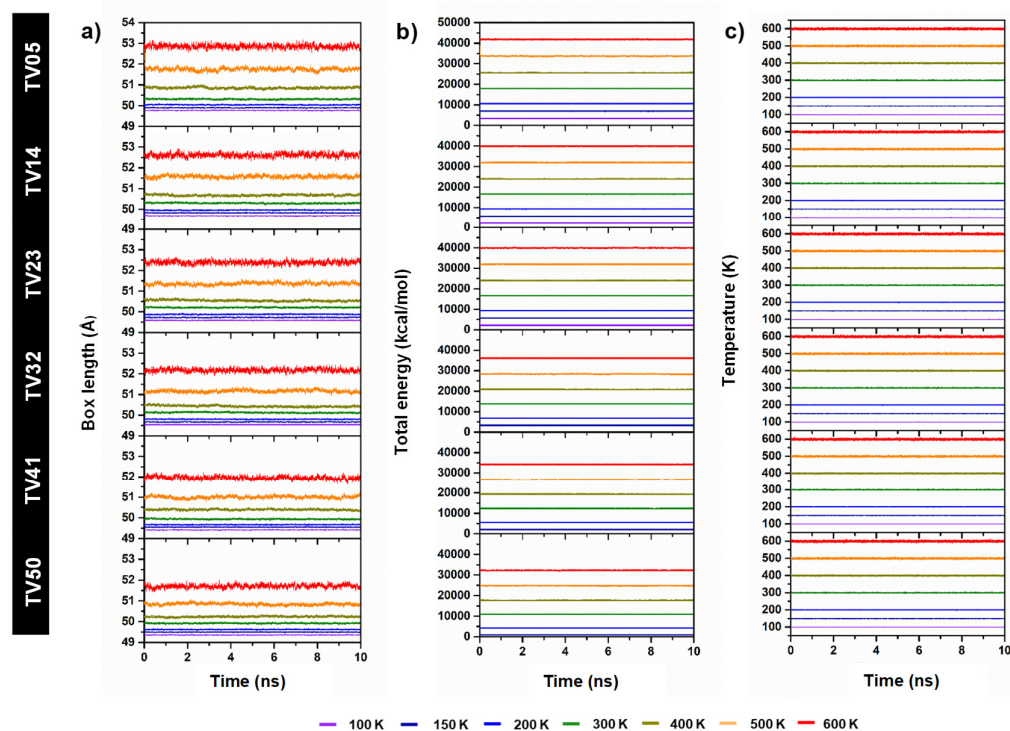

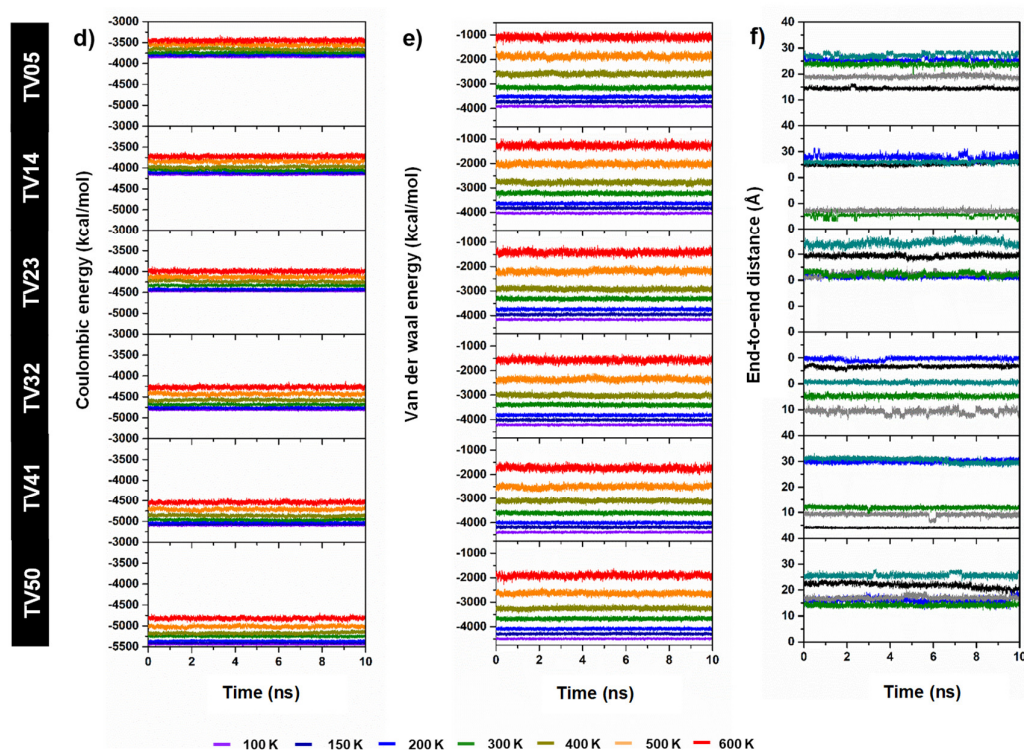

**Figure S1.** The investigation of system equilibrium (a) box length (Å) of production run from 1 to 10 ns, (b) temperature, (c) total energy profile (kcal/mol), (d) coulombic energy(kcal/mol), (e) van der Waal energy (kcal/mol) and (f) end-to-end distances (Å) for each chain.

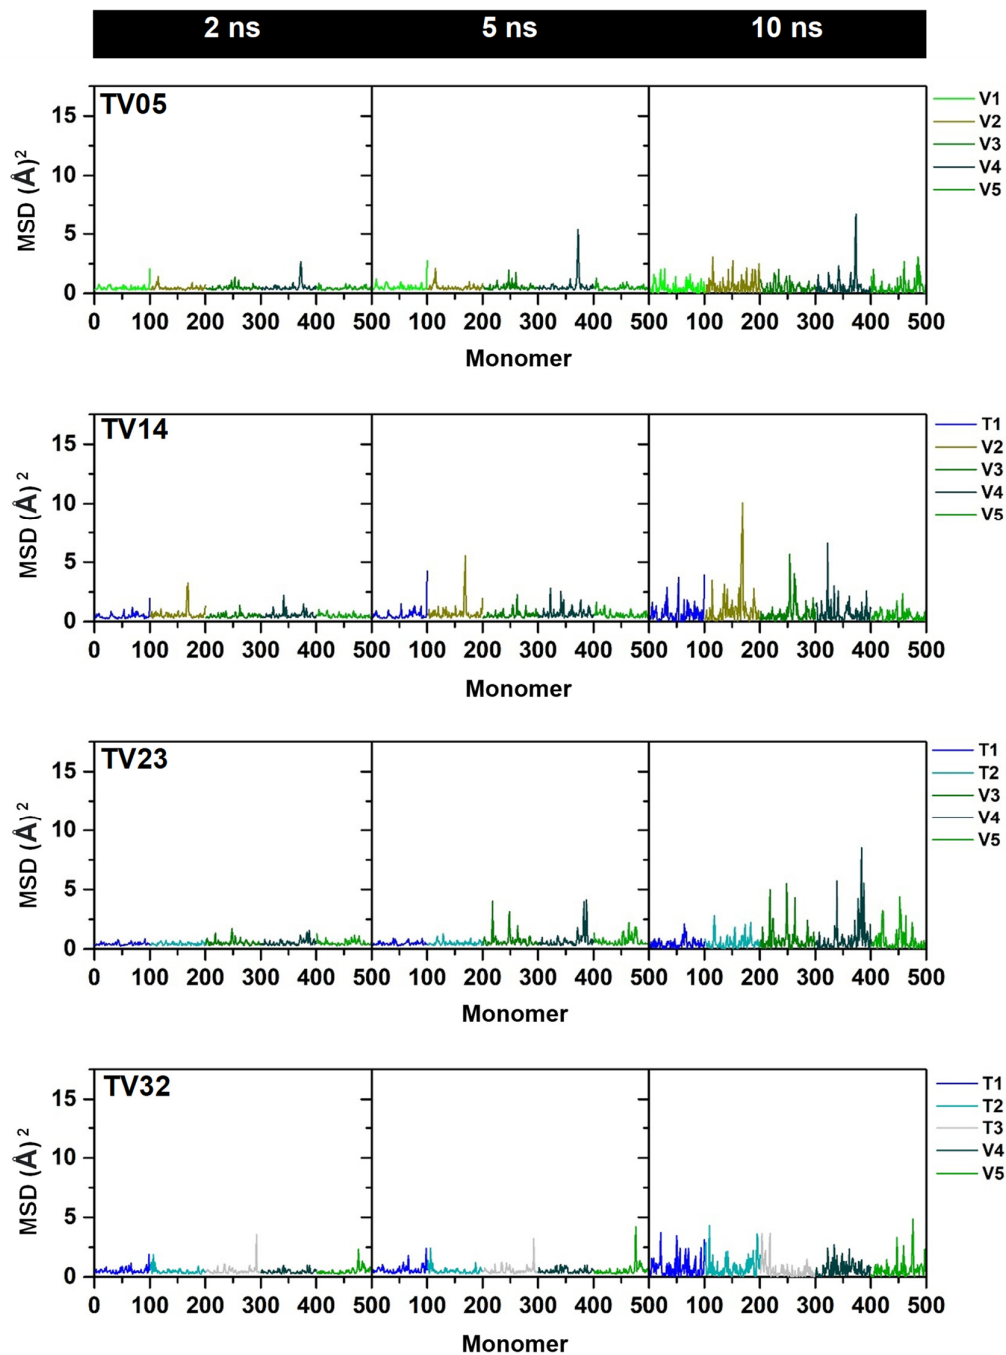

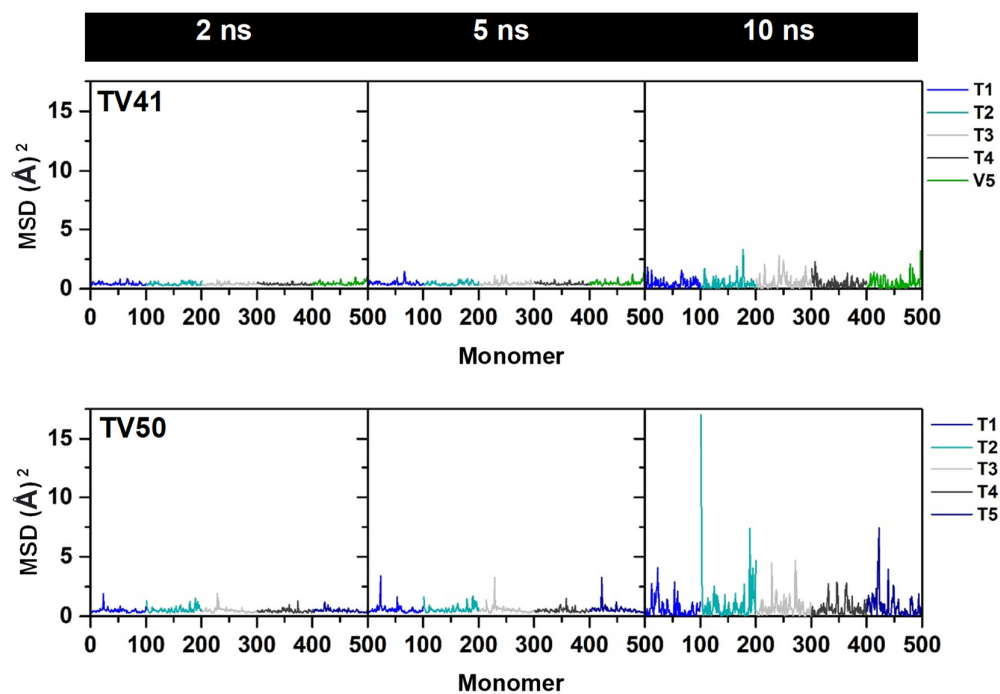

**Figure S2.** Mean square displacement (MSD) of PET/PEV blend at 2 ns, 5 ns, and 10 ns of last 10-ns production run. T represented PET chain and V represented PEV chain.

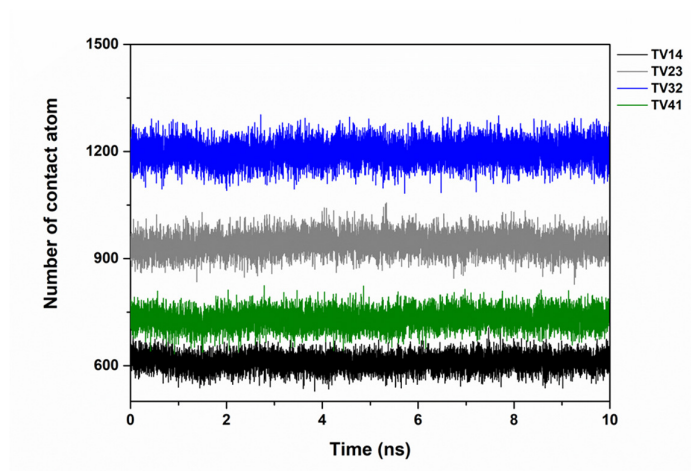

**Figure S3.** The number of contact atom at 6 Å, which represent hydrophobic interaction.

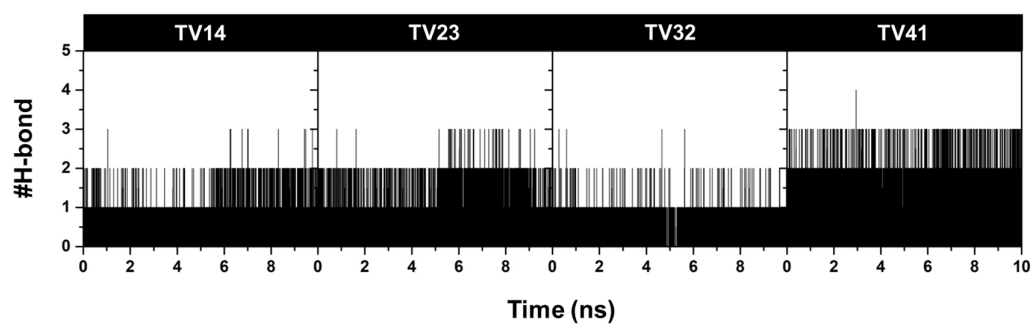

**Figure S4.** The number of hydrogen bonds formed between PET and PEV chains per time using a cut-off of 3.0 Å for CH...O and an angle of  $180 \pm 20$  degrees for CH-H...O.
